# Supplementary material for: Citron kinase-dependent F-actin maintenance at midbody secondary ingression sites mediates abscission
Source: Oxford University Press journal article supplement (doi:10.1242/jcs.209080), 2018-03-27
Supplement: jcs209080supp.pdf [file jcs209080supp.pdf]

## Supplemental Figures

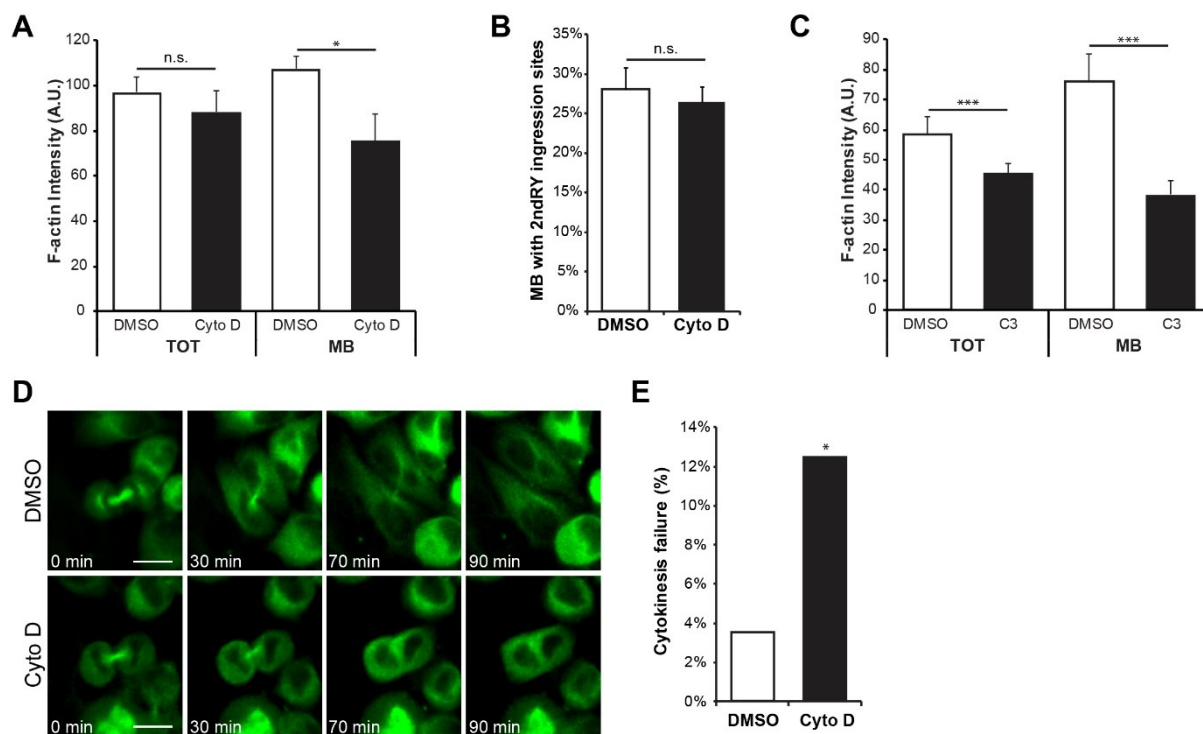

### Supplemental Figure 1. Effects of F-actin depolymerisation in late cytokinesis. (A)

HeLa cells were synchronized in late cytokinesis, treated with 0,4  $\mu$ M Cytochalasin D (CytoD) or DMSO for 60 min and immunostained for  $\alpha$ -tubulin and F-actin. Total cell (TOT) or midbody (MB) F-actin intensity was quantified. (B) Percentage of midbodies with secondary (2ndRY) ingression sites in cell treated as in (A) ( $n > 30$ ) (C) HeLa cells were synchronized in late cytokinesis, treated with the RhoA inhibitor C3-transferase or control solution for 60 min and immunostained for  $\alpha$ -tubulin and F-actin. Total cell (TOT) or midbody (MB) F-actin intensity was quantified ( $n > 30$ , 3 independent experiments).

Data shown in histograms are means  $\pm$  s.e.m. Statistical significance was assessed using a two tails Student T-test. \*  $p < 0.05$ . \*\*\*  $p < 0.001$ .

(D) Time-lapse imaging of  $\alpha$ -tubulin-GFP-expressing HeLa cells was started after Cytochalasin D addition. Scale bars, 20  $\mu$ m. For full movie, see Movies 1-2. (E) Quantification of cytokinesis failures of cells treated as in (D), only cells with complete cleavage furrow ingression at the time of Cytochalasin D addition were analyzed.

Data shown in histogram are the percentage of cytokinesis failures on the total number of cytokinesis analyzed. Statistical significance was assessed using a Chi-square test. \*  $p < 0.05$  ( $n > 60$ ).

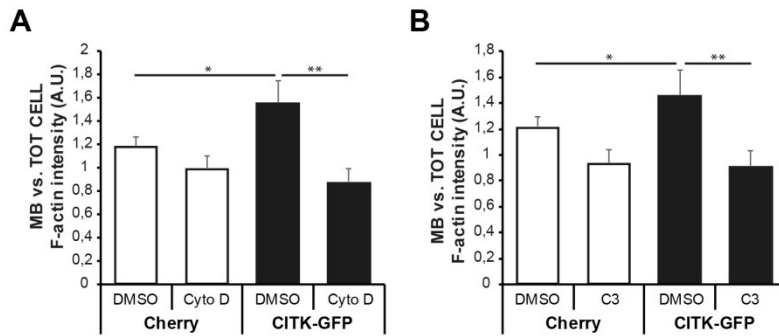

**Supplemental Figure 2. Cytochalasin D treatment and RhoA inhibition could revert actin stabilization at the midbody caused by CITK overexpression.** HeLa cells expressing either GFP or CITK-GFP were synchronized in late cytokinesis, treated with 0.4  $\mu$ M Cytochalasin D or DMSO (A) and with RhoA inhibitor C3-transferase or control solution (B) for 60 min and immunostained for  $\alpha$ -tubulin and F-actin. Midbody (MB) versus total cell (TOT) F-actin intensity was quantified ( $n > 30$ , 6 independent experiments). Data shown in histograms are means  $\pm$  s.e.m. Statistical significance was assessed using a two tails Student T-test. \*  $p < 0.05$ . \*\*  $p < 0.01$ .

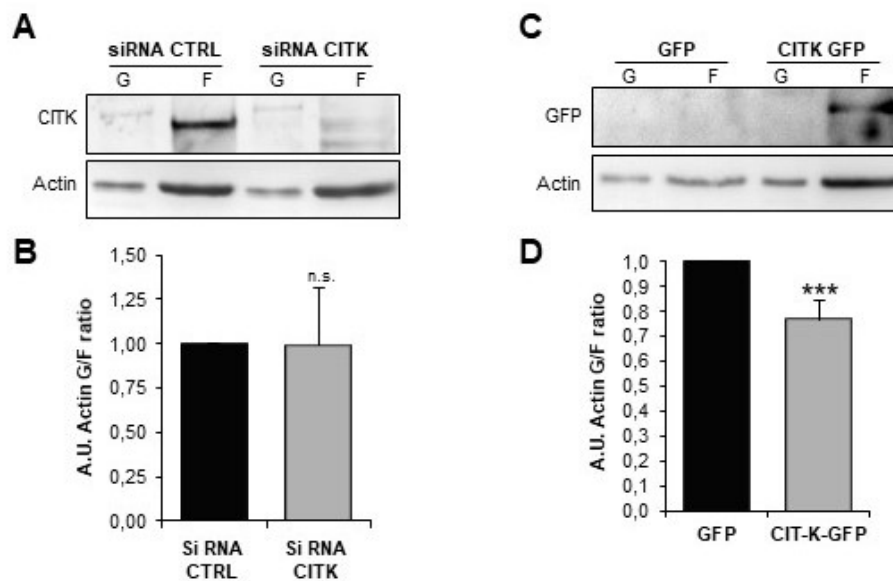

**Supplemental Figure 3. CITK overexpression increases actin polymerization.** G/F actin fractionation was performed on HeLa cells treated with control or CITK siRNAs (A, B) and on GFP or CITK-GFP expressing HeLa cells (C, D) and the resulting lysates were run on western blot, then G/F actin ratio was calculated (n =4). Data shown in histograms are means  $\pm$  s.e.m. Statistical significance was assessed using a two tailed Student T-test. \*\*\* P < 0.001 n.s. not significant.

## Movies

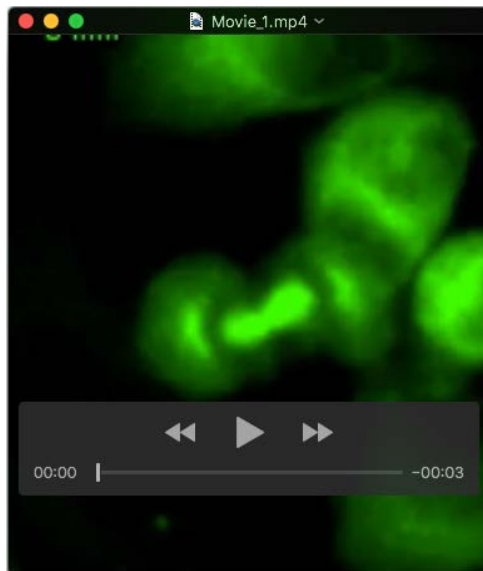

**Movie 1.** Time-lapse of HeLa cells stably expressing TUB-GFP synchronized and treated with DMSO after midbody formation.

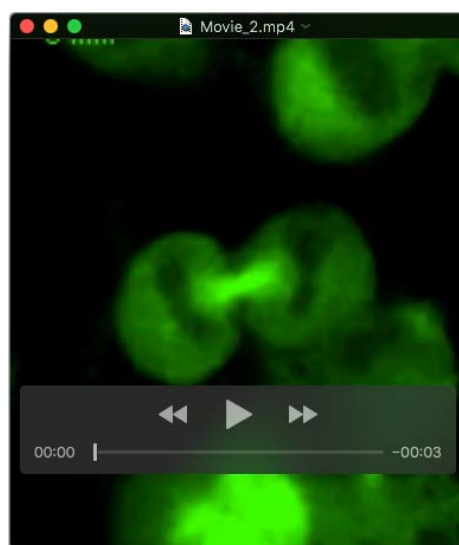

**Movie 2.** Time-lapse of HeLa cells stably expressing TUB-GFP synchronized and treated with 1 $\mu$ M Cytochalasin D after midbody formation.

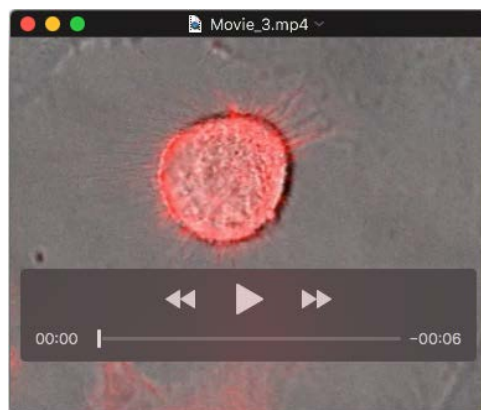

**Movie 3.** Time-lapse of HeLa cells transfected with Lifeact-RFP treated with control siRNA.

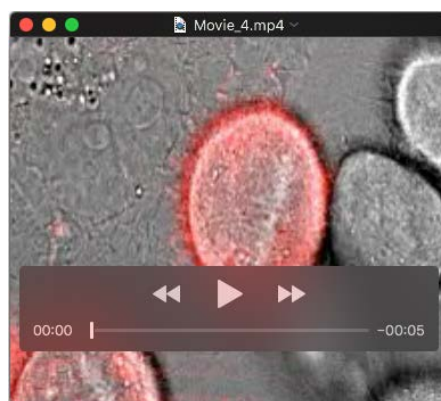

**Movie 4.** Time-lapse of HeLa cells transfected with Lifeact-RFP treated with CIT-K siRNA.

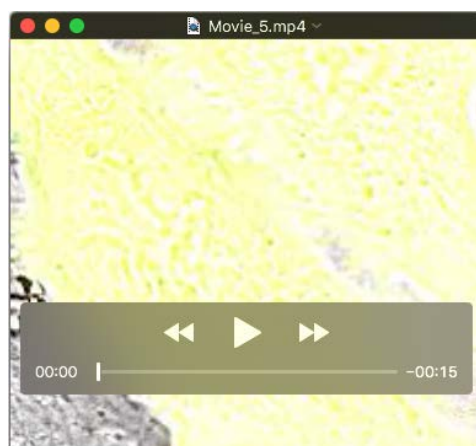

**Movie 5.** Time-lapse of HeLa cells transfected with Lifeact-RFP expressing GFP.

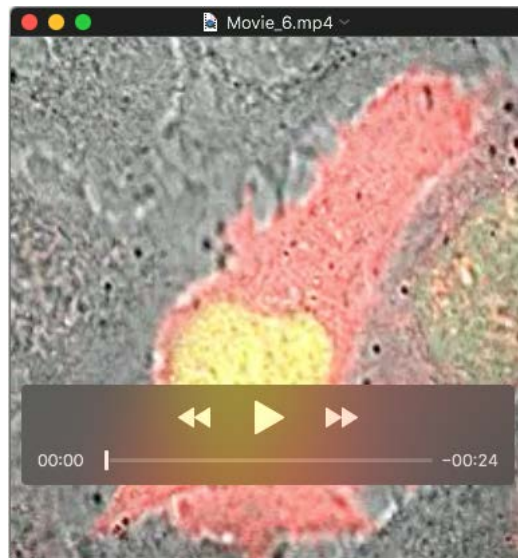

**Movie 6.** Time-lapse of HeLa cells transfected with Lifeact-RFP expressing CITK-GFP.

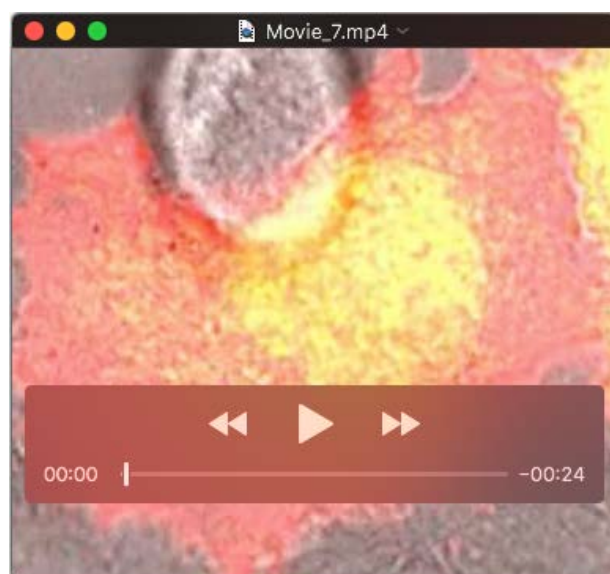

**Movie 7.** Time-lapse of HeLa cells transfected with Lifeact-RFP expressing ANLN-GFP.
